# Supplementary material
Source: PubMed Central journal article supplement (PMC5816685)
Supplement: NIHMS902927-supplement-1.pdf [file NIHMS902927-supplement-1.pdf]

**Supplemental Table S1. Genotyping Primer list**

| <b>Gene</b>  | <b>Forward sequence</b>   | <b>Reverse sequence</b>  |
|--------------|---------------------------|--------------------------|
| Myf5 ICN wt  | ACCCTCCAGCTCCAGACTTATC    | CCCTGTAATGGATTCCAAGCTG   |
| Myf5 ICN mut | ACCCTCCAGCTCCAGACTTATC    | AAAGACCCCTAGGAATGCTC     |
| Bcl2 floxed  | GCCCACCATCTAAAGAGCAA      | GCATTTTCCCACCACTGTCT     |
| Rosa wt      | GTTATCAGTAAGGGAGCTGCAGTGG | GGCGGATCACAAGCAATAATAACC |
| Rosa lox     | AAGACCGCGAAGAGTTTGTCTC    | GGCGGATCACAAGCAATAATAACC |
| Pten         | CAAGCACTCTGCGAACTGAG      | AAGTTTTTGAAGGCAAGATGC    |
